# Supplementary material for: A nanoporous carbonaceous material with a high surface area: synthesis and application in catalysis
Source: Royal Society of Chemistry journal article supplement (doi:10.1039/d3nj05177c), 2023-12-27
Supplement: d3nj05177c1.pdf [file d3nj05177c1.pdf]

## Nanoporous carbonaceous materials with high surface area: synthesis and application in catalysis

Kailai zhang,<sup>ab</sup> Qiuliang Wang,<sup>ab</sup> Zilong Zhong,<sup>ab</sup> Yali Luo<sup>\*ab</sup>, Jie Liu<sup>\*ab</sup>, Yunfei Liu,<sup>ab</sup> Yinong Lyu<sup>ab</sup>

<sup>a</sup> College of Materials Science and Engineering, <sup>b</sup> State Key Laboratory of Materials-Orient

Chemical Engineering, Nanjing Tech University, Nanjing, 210009, P. R. China

\* Corresponding author: Yali Luo · Jie Liu

E-mail address: luoyali@njtech.edu.cn (Y.L. Luo), [liujiecailliao@njtech.edu.cn](mailto:liujiecailliao@njtech.edu.cn) (J. Liu)

### Tables and Figures

**Table S1** Elemental analysis for the monomers and the corresponding polymers (wt%)

|          | C     | H    | O     |
|----------|-------|------|-------|
| BHMB     | 78.50 | 6.54 | 14.96 |
| HCP-BHMB | 84.23 | 4.32 | 7.91  |

**Table S2** Pore parameters of HCP-BHMB, HCP-BHMB-K-800 and the nanocatalysts.

| Samples           | $S_{\text{BET}}^a$<br>( $\text{m}^2 \text{g}^{-1}$ ) | $V_{\text{Total}}^b$<br>( $\text{cm}^3 \text{g}^{-1}$ ) | $V_{\text{Micro}}^c$<br>( $\text{cm}^3 \text{g}^{-1}$ ) | Dominant pore size <sup>d</sup><br>(nm) |
|-------------------|------------------------------------------------------|---------------------------------------------------------|---------------------------------------------------------|-----------------------------------------|
| HCP-BHMB          | 1249                                                 | 0.94                                                    | 0.55                                                    | 0.62, 2.31                              |
| HCP-BHMB-K-800    | 3142                                                 | 2.19                                                    | 1.89                                                    | 0.58, 2.12                              |
| Ag@HCP-BHMB       | 1109                                                 | 0.78                                                    | 0.49                                                    | 0.53, 2.15                              |
| Ag@HCP-BHMB-K-800 | 2733                                                 | 1.88                                                    | 1.59                                                    | 0.55, 2.30                              |

<sup>a</sup> Surface area was calculated from the nitrogen adsorption branch according to the BET model.

<sup>b</sup> The total pore volume was calculated from the single point nitrogen uptake at  $P/P_0 = 0.99$ .

<sup>c</sup> The micropore volume was estimated by the t-plot method.

<sup>d</sup> Pore size derived from  $\text{N}_2$  isotherm with the NLDFT approach.

**Table S3** Comparison of catalytic activity of different catalysts for the reduction of 4-NP. (some TOF values are calculated based on the experimental conditions listed in the reference)

| Name of Catalyst                                        | Metal | Time (min) | k (min <sup>-1</sup> ) | TOF (mol g <sup>-1</sup> s <sup>-1</sup> ) | Ref.      |
|---------------------------------------------------------|-------|------------|------------------------|--------------------------------------------|-----------|
| Ag@HCP-BHMB-K-800                                       | Ag    | 2.5        | 1.26                   | 2.67×10 <sup>-5</sup>                      | This work |
| Ag@HCP-BHMB                                             | Ag    | 10         | 3.1×10 <sup>-1</sup>   | 6.67×10 <sup>-6</sup>                      | This work |
| Ag@NC(1.0 mg)                                           | Ag    | 14         | 4.2×10 <sup>-3</sup>   | 2.38×10 <sup>-6</sup>                      | [1]       |
| Ag/C@mSiO <sub>2</sub> -S                               | Ag    | 7          | 4.5×10 <sup>-1</sup>   | 1.43×10 <sup>-6</sup>                      | [2]       |
| 1.0Ag/p-BNNS-Air                                        | Ag    | 0.75       | 9.01                   | 1.33×10 <sup>-5</sup>                      | [3]       |
| silica-Ag <sub>2</sub>                                  | Ag    | 8          | 5.10×10 <sup>-1</sup>  | 4.17×10 <sup>-7</sup>                      | [4]       |
| Ag-COP(1:1)                                             | Ag    | 5          | 7.32×10 <sup>-1</sup>  | 3.33×10 <sup>-7</sup>                      | [5]       |
| Ag@CCTPB-K                                              | Ag    | 3.5        | 8.7×10 <sup>-1</sup>   | 1.90×10 <sup>-5</sup>                      | [6]       |
| Ag@γ-Fe <sub>2</sub> O <sub>3</sub> /t-ZrO <sub>2</sub> | Ag    | 1.5        | 2.80                   | 3.33×10 <sup>-6</sup>                      | [7]       |
| PMPA-1                                                  | Ag    | 6          | 5.7×10 <sup>-1</sup>   | 5.56×10 <sup>-7</sup>                      | [8]       |
| Au/TNT                                                  | Au    | 60         | 6.1×10 <sup>-2</sup>   | 3.52×10 <sup>-6</sup>                      | [9]       |
| Au@NH <sub>2</sub> -MSNs                                | Au    | 8          | 3.7×10 <sup>-1</sup>   | 1.04×10 <sup>-5</sup>                      | [10]      |
| Au-Ce-MOF                                               | Au    | 10         | 3.24×10 <sup>-1</sup>  | 1.67×10 <sup>-6</sup>                      | [11]      |
| CG-Ag <sub>2</sub> O/Au-SiO <sub>2</sub>                | Au    | 7          | 4.89×10 <sup>-1</sup>  | 1.19×10 <sup>-5</sup>                      | [12]      |
| PCNFs-Au                                                | Au    | 0.83       | 6.27                   | 1.5×10 <sup>-5</sup>                       | [13]      |
| NH <sub>2</sub> -MIL-88B(Fe)@Au@COFs                    | Au    | 25         | 1.31×10 <sup>-1</sup>  | 16×10 <sup>-5</sup>                        | [14]      |
| Pd/HKUST-1(Pd-14.4)                                     | Pd    | 3          | 9.84×10 <sup>-1</sup>  | 4.17×10 <sup>-6</sup>                      | [15]      |
| Pd/PC-POP(3.7% Pd)                                      | Pd    | 5.95       | 5.64×10 <sup>-1</sup>  | 1.51×10 <sup>-5</sup>                      | [16]      |
| Co/PCNS                                                 | Co    | 7          | 3.15×10 <sup>-1</sup>  | 6.85×10 <sup>-6</sup>                      | [17]      |
| CoPOP-2                                                 | Co    | 15         | 6.9×10 <sup>-2</sup>   | 1.56×10 <sup>-6</sup>                      | [18]      |
| Co-Fe <sub>3</sub> O <sub>4</sub> @C-A                  | Co    | 1.3        | 2.10                   | 3.75×10 <sup>-5</sup>                      | [19]      |

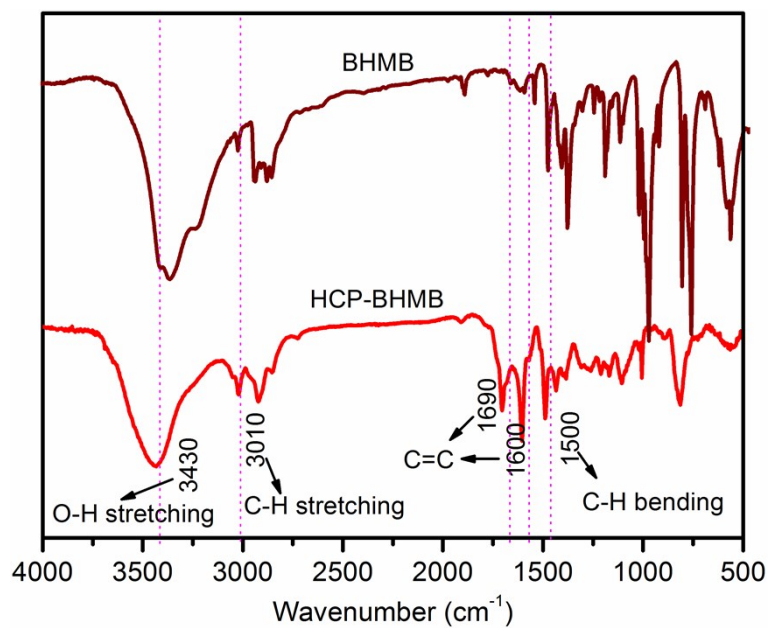

Fig. S1 Comparison of the FTIR spectra of BHMB and HCP-BHMB.

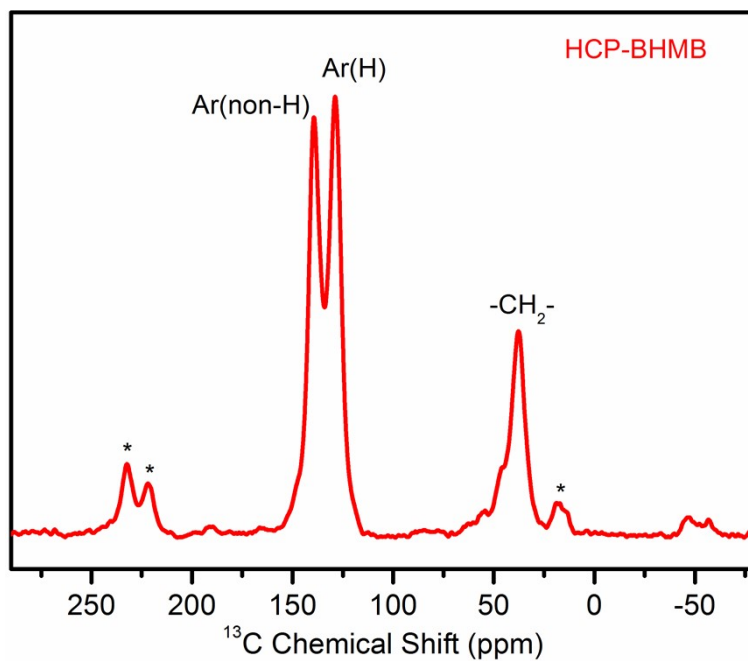

Fig. S2  $^{13}\text{C}$  CP/MAS NMR spectrum of HCP-BHMB.

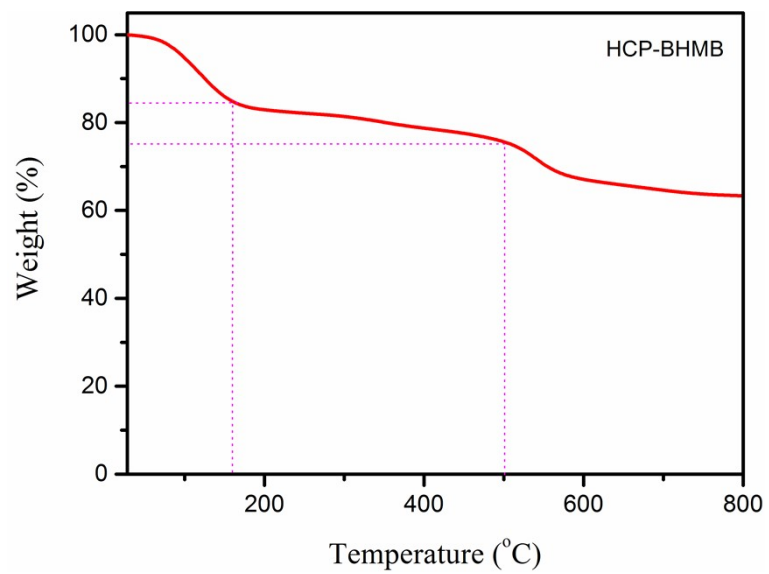

Fig. S3 TGA curve of HCP-BHMB at a ramp of 10 °C min<sup>-1</sup> in nitrogen atmosphere.

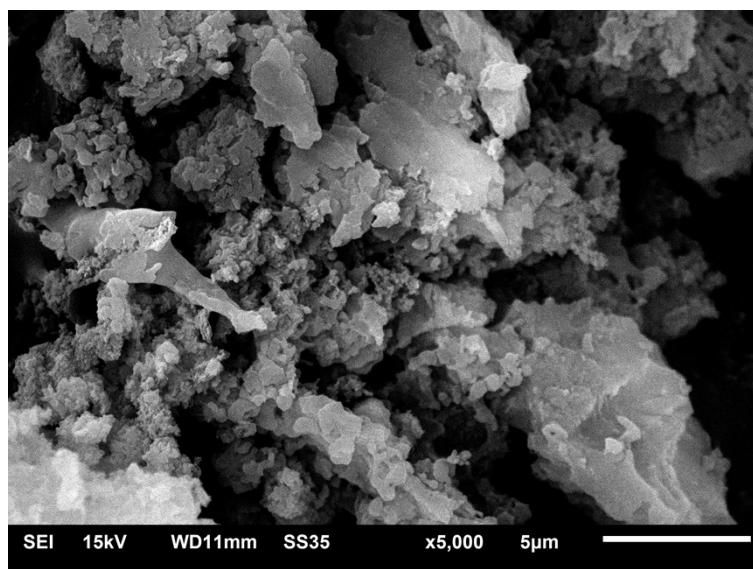

Fig. S4 SEM image of HCP-BHMB.

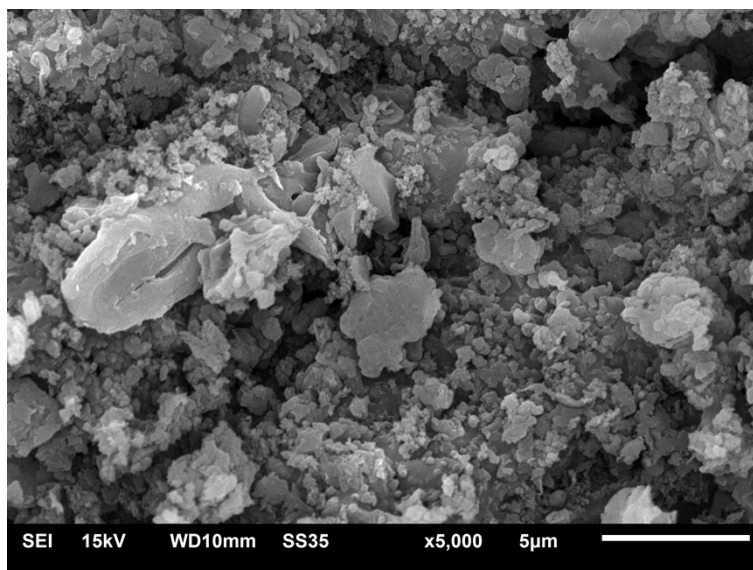

Fig. S5 SEM image of HCP-BHMB-K-800.

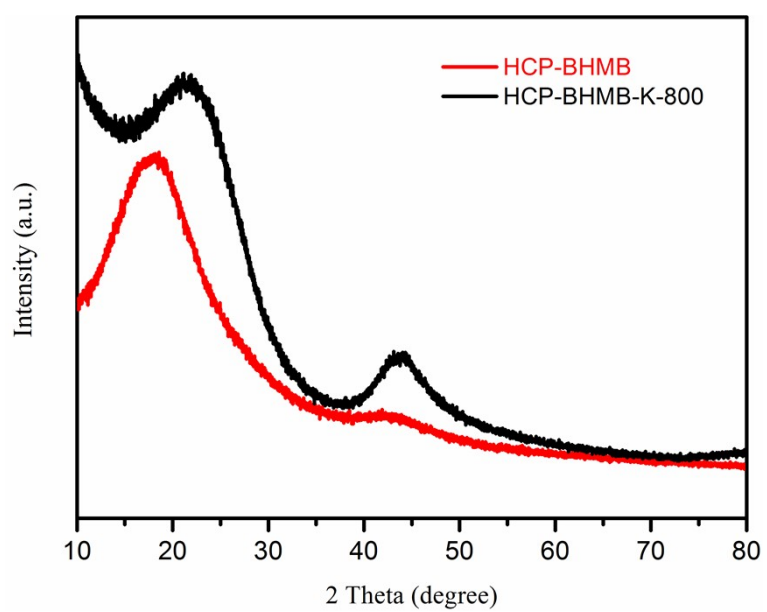

Fig. S6 Powder X-Ray diffraction (PXRD) of HCP-BHMB and HCP-BHMB-K-800.

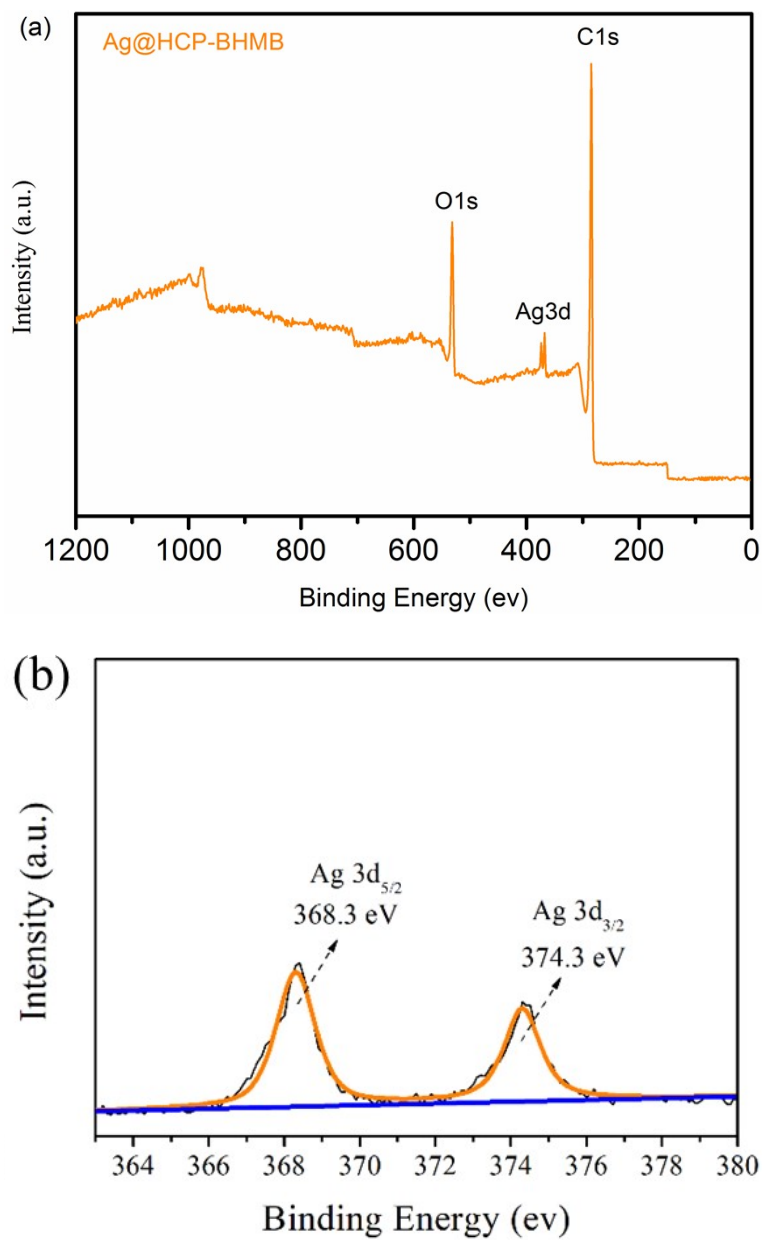

Fig. S7 XPS analysis of Ag@HCP-BHMB. (a) Survey scan of Ag@HCP-BHMB and (b) high-resolution Ag 3d XP spectra of Ag@HCP-BHMB.

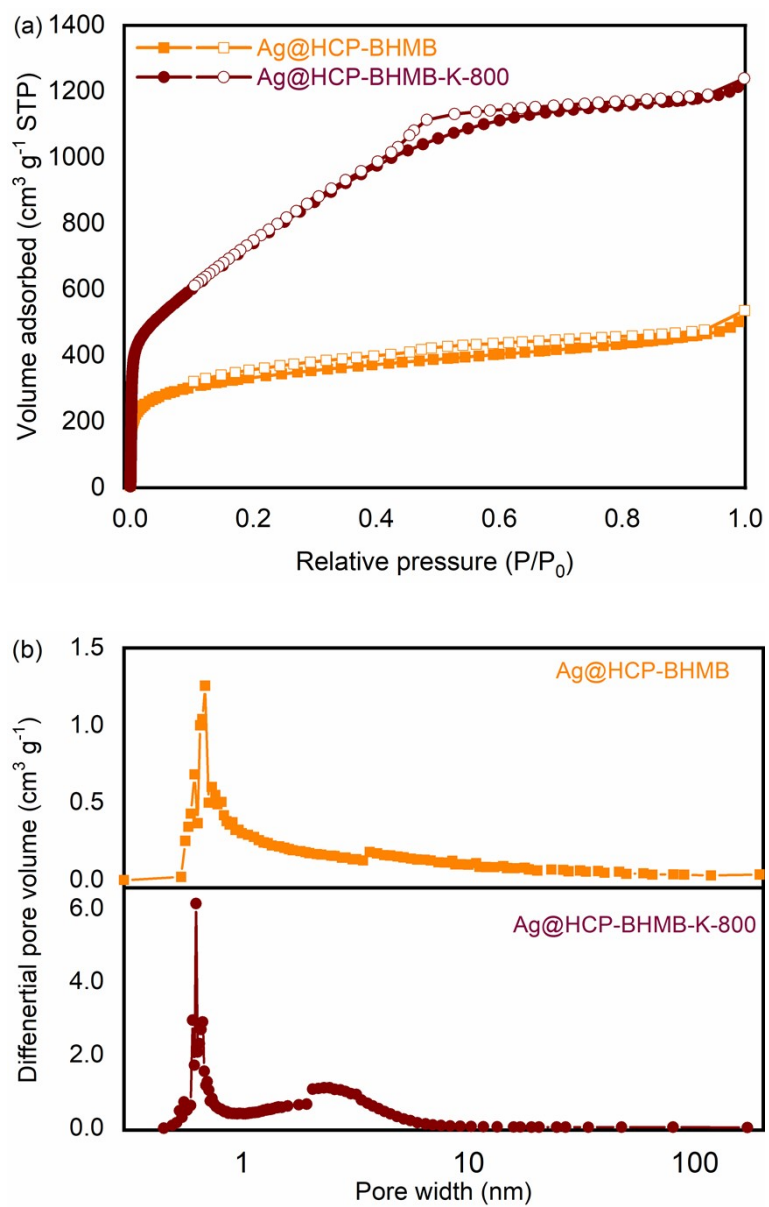

Fig. S8 (a) N<sub>2</sub> adsorption-desorption isotherms and (b) pore size distribution curves of Ag@HCP-BHMB and Ag@HCP-BHMB-K-800.

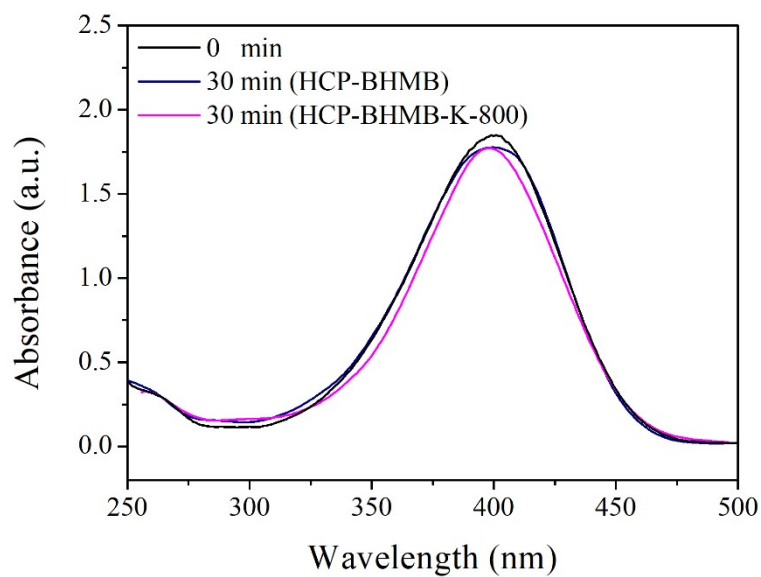

Fig. S9 Time-dependent UV-Vis absorption spectra for the reduction of 4-nitrophenol reduction with  $\text{NaBH}_4$  in the presence of HCP-BHMB and HCP-BHMB-K-800.

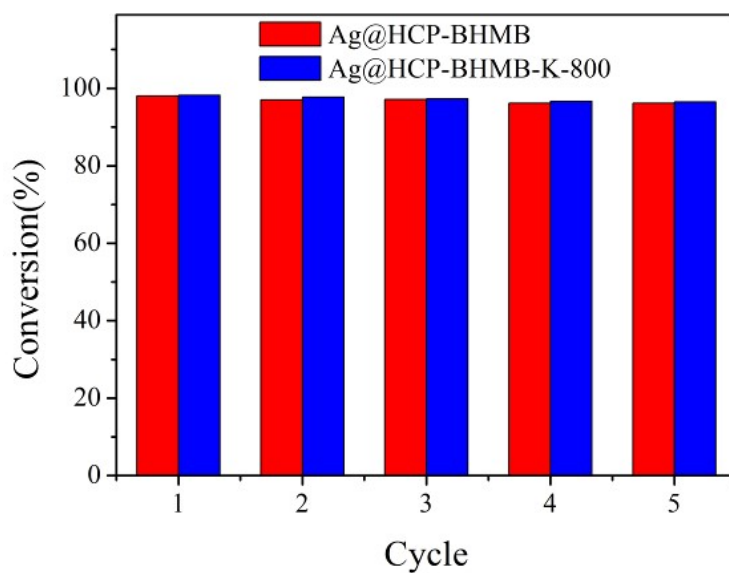

Fig. S10 Reusability of  $\text{Ag@HCP-BHMB}$  and  $\text{Ag@HCP-BHMB-K-800}$  nanocatalysts for the reduction of 4-NP by  $\text{NaBH}_4$ .



## References

- 1 V. Veeramani, N. Van Chi, Y.-L. Yang, N. T. Hong Huong, T. Van Tran, T. Ahamad, S. M. Alshehri and K. C. W. Wu, *RSC Adv.*, 2021, **11**, 6614-6619.
- 2 S. Liu, Y. Qi, L. Cui, Q. Dai, S. Zeng and C. Bai, *Appl. Surf. Sci.*, 2019, **493**, 1013-1020.
- 3 Q. Lu, J. An, Y. Duan, Q. Luo, R. Yin, X. Li, C. Tang and D. Wang, *J. Catal.*, 2021, **395**, 457-466.
- 4 A. Wei, L. Shen, S. Chen, L. Guo and W. Chen, *J. Phys. Chem. Solids*, 2019, **135**, 109106.
- 5 F. Rezaei and M. Dinari, *Colloids Surf. A Physicochem. Eng. Asp.*, 2021, **618**, 126441.
- 6 Q. Wang, Y. Liu, Q. Meng, Y. Zhu, J. Xie, Y. Luo and Y. Lyu, *Micropor. Mesopor. Mater.*, 2019, **290**, 109672.
- 7 S. Gholizadeh Khasevani, N. Faroughi and M. R. Gholami, *Mater. Res. Bull.*, 2020, **126**, 110838.
- 8 H. Huang, C. Li, Q. Zhang, J. Huang, J. Ji, Y. Liu and L. Li, *Polym. Compos.*, 2023, **44**, 7674-7686.
- 9 K. Shanmugaraj, T. M. Bustamante, C. C. Torres and C. H. Campos, *Catal. Today*, 2022, **388-389**, 383-393.
- 10 D. Ren, J. Xu, N. Chen, Z. Ye, X. Li, Q. Chen and S. Ma, *Colloids Surf. A Physicochem. Eng. Asp.*, 2021, **611**, 125773.
- 11 S. Guo, H. Yuan, W. Luo, X. Liu, X. Zhang, H. Jiang, F. Liu and G. J. Cheng, *Nano Res.*, 2021, **14**, 1287-1293.
- 12 N. K. R. Bogireddy, A. G. El Hachimi, Y. R. Mejia, M. K. Kesarla, R. S. Varma, R. H. Becerra and V. Agarwal, *npj Clean Water*, 2022, **5**, 40.
- 13 J. Wang, C. Cai, Z. Zhang, C. Li and R. Liu, *Chemosphere*, 2020, **239**, 124833.
- 14 S. Liu, C. Mao, C. Yang, P. Hong, M. Zhu, Y. Zhou and Y. Zhang, *New J. Chem.*, 2023, **47**, 8161-8169.
- 15 M. Kubo, T. Matsumoto and M. Shimada, *Adv. Powder Technol.*, 2022, **33**, 103701.
- 16 M. Yuan, R. Yang, S. Wei, X. Hu, D. Xu, J. Yang and Z. Dong, *J. Colloid Interface Sci.*, 2019, **538**, 720-730.
- 17 L. Hu, X. Liu, A. Guo, J. Wu, Y. Wang, Y. Long and G. Fan, *Sep. Purif. Technol.*, 2022, **288**, 120595.
- 18 S. Gopi, A. G. Ramu, S. Sakthivel, G. Maia, C.-H. Jang, D. Choi and K. Yun, *Chemosphere*, 2021, **265**, 129052.
- 19 A. F. Baye, R. Appiah-Ntiamoah and H. Kim, *Sci. Total Environ.*, 2020, **712**, 135492.
